# Supplementary material for: Cystatin C: immunoregulation role in macrophages infected with Porphyromonas gingivalis
Source: PeerJ. 2024 Apr 30;12:e17252. doi: 10.7717/peerj.17252 (PMC11067906; doi:10.7717/peerj.17252)
Supplement: Supplemental Information 1 [file peerj-12-17252-s001.xlsx]

## Sheet: Hoja1
	ANTIMICROBIAL ACTIVITY
	INCUBATION TIME (hours)	CONTROL						1.25 µg/mL						1.5 µg/mL						1.75 µg/mL						2 µg/mL						2.25 µg/mL						2.5 µg/mL						2.75
	1	0.1	0.15	0.12	0.1	0.11		0.09	0.11	0.11	0.12	0.13		0.12	0.12	0.11	0.1	0.12		0.08	0.06	0.04	0.07	0.07		0.08	0.06	0.04	0.07	0.07		0.08	0.06	0.04	0.07	0.07		0.1	0.1	0.12	0.15	0.14		0.06	0.04	0.04	0.04	0.03
	12	0.25	0.28	0.39	0.35	0.27		0.25	0.26	0.26	0.29	0.29		0.27	0.26	0.28	0.28	0.29		0.23	0.22	0.22	0.26	0.25		0.19	0.2	0.18	0.17	0.2		0.19	0.2	0.18	0.17	0.2		0.18	0.21	0.19	0.23	0.21		0.08	0.07	0.05	0.05	0.07
	24	0.54	0.55	0.5	0.53	0.48		0.5	0.48	0.5	0.52	0.5		0.47	0.46	0.49	0.49	0.48		0.38	0.4	0.4	0.4	0.38		0.39	0.38	0.4	0.39	0.39		0.2	0.19	0.21	0.22	0.18		0.08	0.07	0.06	0.06	0.04		0.015	0.018	0.019	0.017	0.018
	48	0.76	0.65	0.82	0.78	0.69		0.68	0.69	0.68	0.7	0.71		0.66	0.65	0.64	0.63	0.64		0.55	0.57	0.58	0.58	0.58		0.4	0.43	0.43	0.42	0.42		0.22	0.26	0.21	0.19	0.2		0.05	0.05	0.04	0.03	0.04		0.01	0.01	0.01	0.1	0
	96	0.5	0.52	0.56	0.54	0.53		0.46	0.5	0.5	0.46	0.48		0.46	0.46	0.46	0.46	0.48		0.33	0.35	0.35	0.35	0.33		0.35	0.34	0.35	0.35	0.34		0.15	0.17	0.18	0.18	0.18		0.004	0.004	0.003	0.003	0.002		0	0	0	0	0
PERCENTAGE OF VIABILITY OF MACROPHAGE
Control	1.25 µg/mL	1.5 µg/mL	1.75 µg/mL	2 µg/mL	2.5 µg/mL	2.75 µg/mL
100	95	93	99	92	96	99
100	88	92	91	90	95	98
100	98	98	99	96	98	97
100	98	95	95	96	97	96
94	99	99	89	97	97	96
INTRACELLULAR SURVIVAL OF P. gingivalis
	INCUBATION TIME (hours)	Control (CFU/mL)						P. gingivalis CFU/mL						P. gingivalis /Cystatin C (CFU/Ml)
	1	0	0	0	0	0		160000	200000	180000	180000	200000		180000	200000	180000	180000	180000
	3	0	0	0	0	0		460000	450000	450000	450000	450000		400000	400000	380000	380000	380000
	24	0	0	0	0	0		425000	400000	465000	468000	465000		320000	320000	300000	300000	314000
	48	0	0	0	0	0		444000	445000	445000	470000	470000		130000	130000	100000	80000	60000
	96	0	0	0	0	0		300000	350000	320000	220000	200000		30000	25000	32000	30000	28000
TNF-α (pg/mL)
Control	LPS	Cys C	P. gingivalis	P. gingivalis / Cys C
0	1800	0	1700	600
0	1650	100	1650	650
0	1600	100	1700	500
0	1750	100	1400	500
0	1500	50	1640	630
IL-1β (pg/mL)
Control	LPS	Cys C	P. gingivalis	P. gingivalis / Cys C
0	1300	0	750	400
0	1200	0	900	500
0	1220	0	1000	550
0	1310	0	1000	570
0	1200	0	950	300
IL-10 (pg/mL)
Control	LPS	Cys C	P. gingivalis	P. gingivalis / Cys C
0	350	786	150	1200
0	300	800	176	1100
0	300	820	188	1250
0	250	820	199	1000
0	350	790	159	1000
ROS PRODUCTION (Mean fluorescence intensity MFI)
Control	LPS	Cys C	P. gingivalis	P. gingivalis / Cys C
0	6000	2500	4500	7250
0	6200	2300	4300	7000
0	6800	2200	4200	6800
0	6500	2300	4000	6900
0	6250	2500	4000	6800
NITRITE PRODUCTION (µM)
Control	LPS	Cys C	P. gingivalis	P. gingivalis / Cys C
0	8	0	10	5
0	6.5	1	10	5
0	8.5	2	11	6
0	6.2	1	9	7
0	7	2	9	8
TUNEL assay (percentage of positive cells)
Control	DNase I	Cys C	P. gingivalis	P. gingivalis / Cys C
0	88	10	50	34
0	95	12	60	32
0	99	2.7	57	25
0	82	9	68	29
0	80	17	65	20
Annexin V staining (percentage of positive cells)
Control	Camptothecin	Cys C	P. gingivalis	P. gingivalis / Cys C
0	95	9	62	50
0	92	12	68	43
0	90	12	66	43
0	80	6	75	40
0	80	5	80	32
Caspase -3 (OD nm)
Control	Camptothecin	Cys C	P. gingivalis	P. gingivalis / Cys C
0	0.18	0.09	0.2	0.12
0	0.2	0.04	0.23	0.14
0	0.17	0.05	0.16	0.1
0	0.16	0.07	0.17	0.1
0	0.17	0.06	0.2	0.11
